# Supplementary material for: The Odilorhabdin Antibiotic Biosynthetic Cluster and Acetyltransferase Self-Resistance Locus Are Niche and Species Specific
Source: PubMed Central journal article supplement (PMC8749412; doi:10.1128/mbio.02826-21), 2022-01-11

**Fig. S4. LC-MS analysis** of NOSO-95C and acetylated derivatives after *in vitro* acetylation (see Materials and Methods) at different times of reaction (15 min, 4h, or 24h) with Acetyl-CoA (**B**), or Odilorhabdin acetyltransferase A (OatA) (**C**), or both (**A**). For each tested condition, a table and corresponding LC-MS chromatograms present observed ions with retention time, peak area and suggested compounds. LC-MS were performed on an Agilent 1260 Infinity HPLC system with a Waters Symmetry analytical C18 column (5  $\mu\text{m}$ , 4.6 mm $\times$ 150 mm). We injected 10  $\mu\text{L}$  of reaction mixture into the apparatus, the flow rate was set to 0.7 mL/min and UV detection was performed at 220, 230 and 250 nm. The following mobile phases were used: A: 0.1% trifluoroacetic acid in water; B: acetonitrile. The following gradient was used: 2 to 30% of B in A from 0 to 15 min. ESI-LC-MS data were obtained in positive mode on an Agilent 1260 Infinity system (Agilent 6120 Quadrupole LC/MS, 1260 Quaternary Pump, 1260 ALS, 1260 TCC, 1260 DAD VL, 1260 FC-AS).

**A: Odilorhabdin acetyltransferase A (OatA) + acetyl-CoA + NOSO-95C (400  $\mu\text{g}/\text{mL}$ )**

- Incubation time: 15 min

| Retention time (min) | Peak Area (230 nm) | Ion mass                                                                                                                    | Proposed compound                                                                          |
|----------------------|--------------------|-----------------------------------------------------------------------------------------------------------------------------|--------------------------------------------------------------------------------------------|
| 9.71                 | 1106               | [M+H] <sup>+</sup> : 1308.7<br>[M+2H] <sup>2+</sup> : 632.8<br>[M+2H] <sup>2+</sup> : 653.9<br>[M+2H] <sup>2+</sup> : 674.8 | Mono-Acetylated NOSO-95C<br>NOSO-95C<br>Mono-Acetylated NOSO-95C<br>Bi-acetylated NOSO-95C |

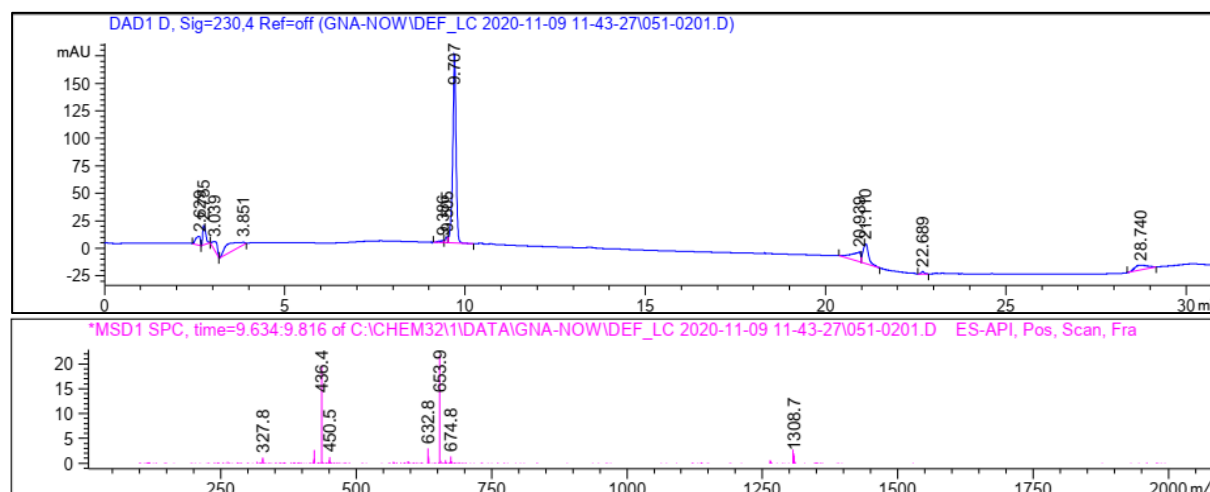

- Incubation time : 4h

| Retention time (min) | Peak Area (230 nm) | Ion mass                                                                                    | Proposed compound                                                            |
|----------------------|--------------------|---------------------------------------------------------------------------------------------|------------------------------------------------------------------------------|
| 9.67                 | 1001               | [M+H] <sup>+</sup> : 1349.7<br>[M+2H] <sup>2+</sup> : 654.0<br>[M+2H] <sup>2+</sup> : 675.0 | Bi-Acetylated NOSO-95C<br>Mono-Acetylated NOSO-95C<br>Bi-Acetylated NOSO-95C |
| 10.41                | 40                 | [M+H] <sup>+</sup> : 1392.2<br>[M+2H] <sup>2+</sup> : 695.8                                 | Tri-Acetylated NOSO-95C<br>Tri-Acetylated NOSO-95C                           |

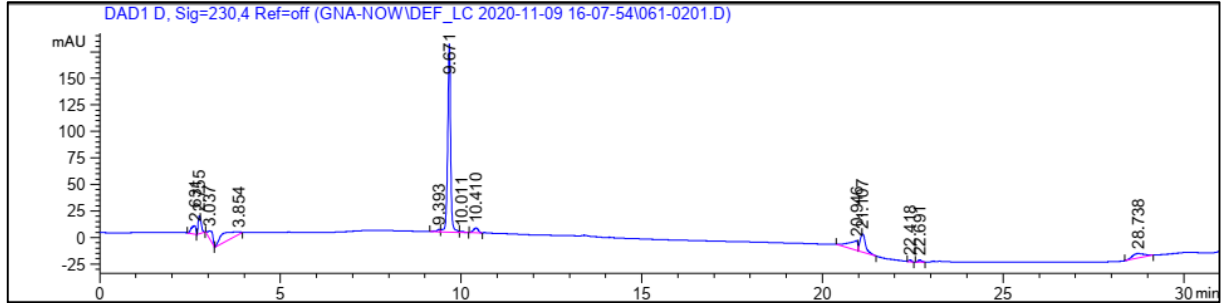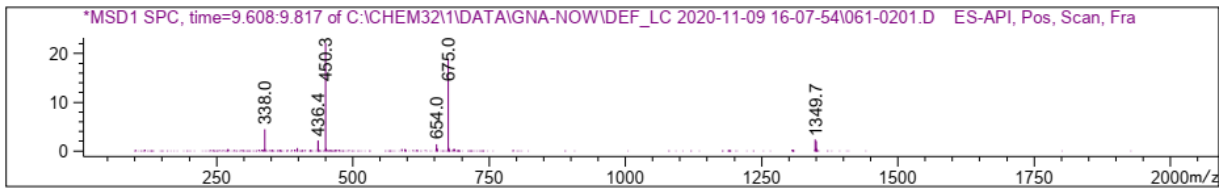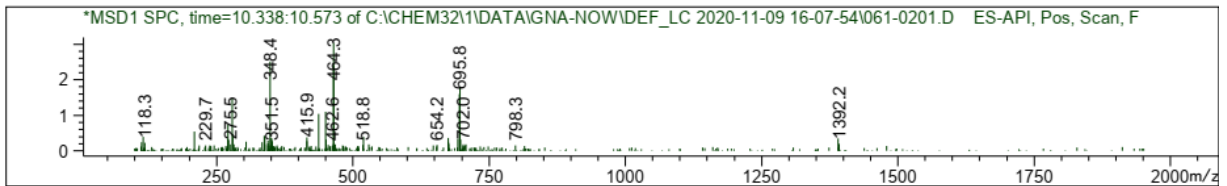

- Incubation time : 24h

| Retention time (min) | Peak Area (230 nm) | Ion mass                                                    | Proposed compound                                  |
|----------------------|--------------------|-------------------------------------------------------------|----------------------------------------------------|
| 9.67                 | 579                | [M+H] <sup>+</sup> : 1349.6<br>[M+2H] <sup>2+</sup> : 674.8 | Bi-Acetylated NOSO-95C<br>Bi-Acetylated NOSO-95C   |
| 10.41                | 137                | [M+H] <sup>+</sup> : 1391.7<br>[M+2H] <sup>2+</sup> : 696.2 | Tri-Acetylated NOSO-95C<br>Tri-Acetylated NOSO-95C |

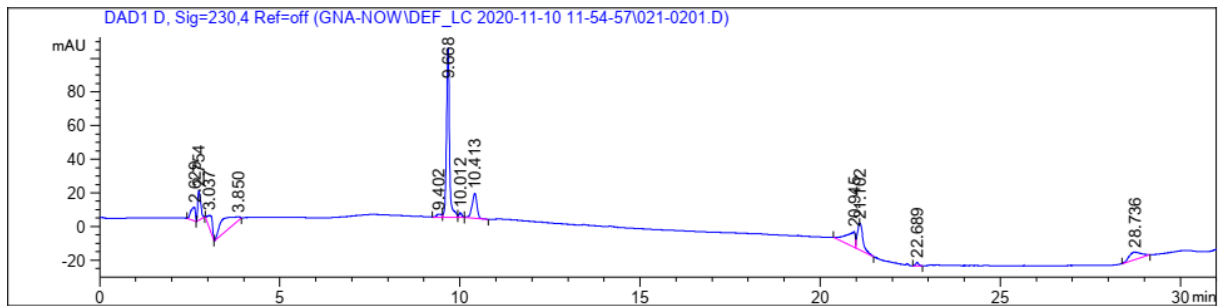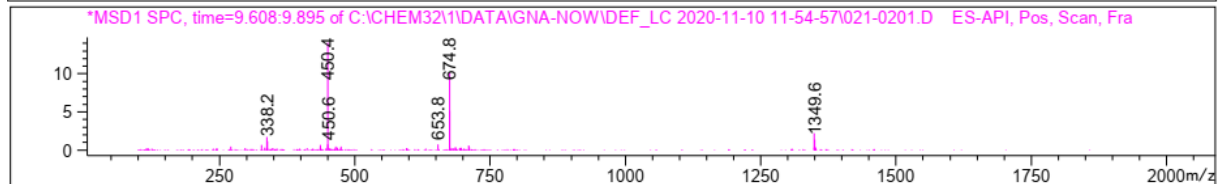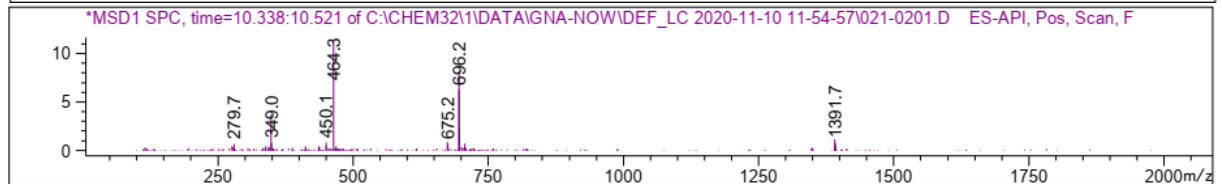

## B: Acetyl-CoA + NOSO-95C (400 µg/mL)

- Incubation time: 15 min

| Retention time (min) | Peak Area (230 nm) | Ion mass                                                    | Proposed compound    |
|----------------------|--------------------|-------------------------------------------------------------|----------------------|
| 9.71                 | 1139               | [M+H] <sup>+</sup> : 1265.6<br>[M+2H] <sup>2+</sup> : 633.0 | NOSO-95C<br>NOSO-95C |

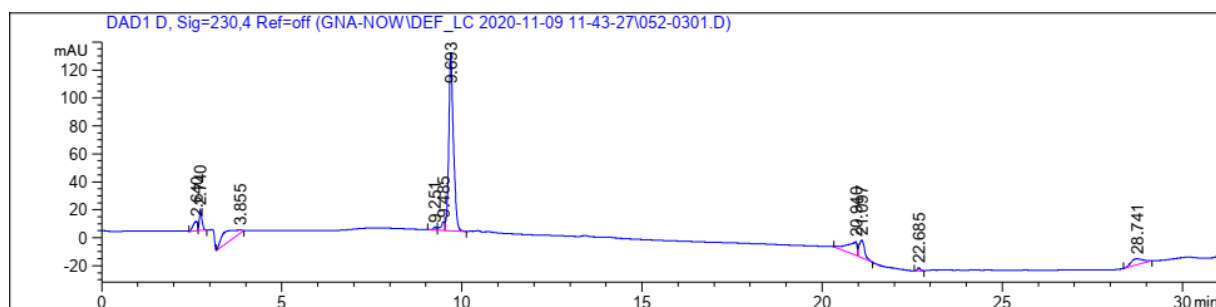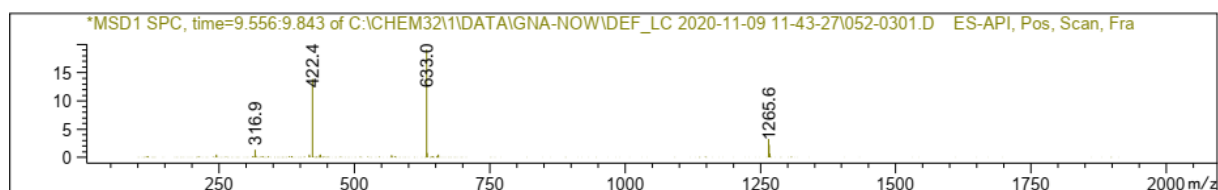

- Incubation time: 4h

| Retention time (min) | Peak Area (230 nm) | Ion mass                                                                                    | Proposed compound                                    |
|----------------------|--------------------|---------------------------------------------------------------------------------------------|------------------------------------------------------|
| 9.71                 | 1062               | [M+H] <sup>+</sup> : 1266.4<br>[M+2H] <sup>2+</sup> : 633.2<br>[M+2H] <sup>2+</sup> : 653.8 | NOSO-95C<br>NOSO-95C<br>Mono-Acetylated NOSO-95C     |
| 10.36                | 33                 | [M+H] <sup>+</sup> : 1307.7<br>[M+2H] <sup>2+</sup> : 654.0                                 | Mono-Acetylated NOSO-95C<br>Mono-Acetylated NOSO-95C |

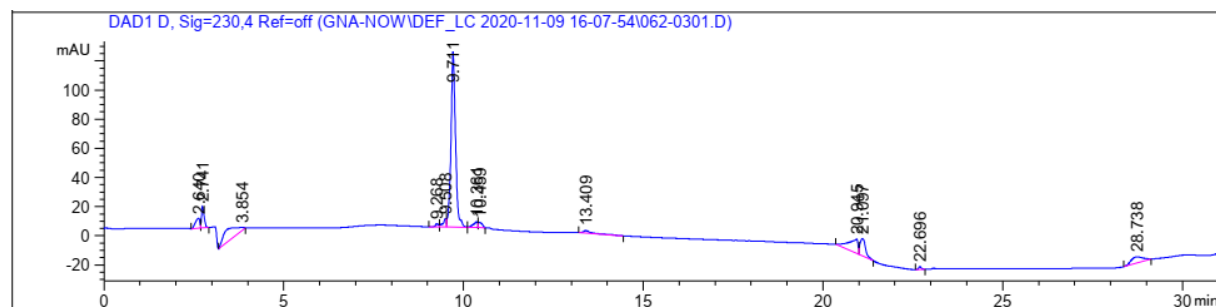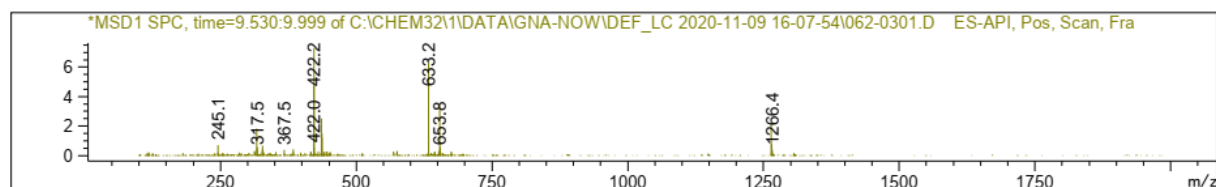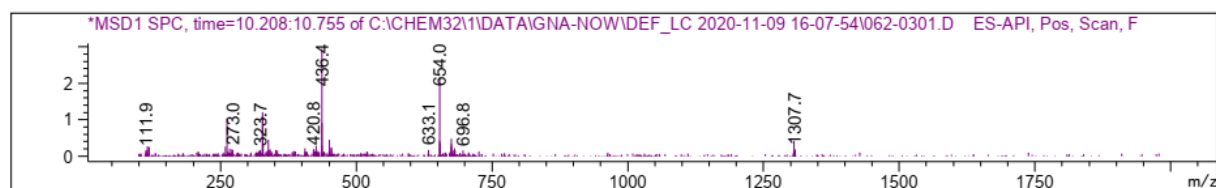

- Incubation time: 24h

| Retention time (min) | Peak Area (230 nm) | Ion mass                                                                                                                   | Proposed compound                                                                                        |
|----------------------|--------------------|----------------------------------------------------------------------------------------------------------------------------|----------------------------------------------------------------------------------------------------------|
| 9.68                 | 625                | [M+H] <sup>+</sup> : 1266.8<br>[M+H] <sup>+</sup> : 1308.6<br>[M+2H] <sup>2+</sup> : 633.2<br>[M+2H] <sup>2+</sup> : 654.0 | NOSO-95C<br>NOSO-95C<br>Mono-Acetylated NOSO-95C<br>Mono-Acetylated NOSO-95C                             |
| 9.91                 | 43                 | [M+H] <sup>+</sup> : 1308.6<br>[M+2H] <sup>2+</sup> : 654.3                                                                | Mono-Acetylated NOSO-95C<br>Mono-Acetylated NOSO-95C                                                     |
| 10.33                | 190                | [M+H] <sup>+</sup> : 1306.6<br>[M+H] <sup>+</sup> : 1348.6<br>[M+2H] <sup>2+</sup> : 655.7<br>[M+2H] <sup>2+</sup> : 675.0 | Mono-Acetylated NOSO-95C<br>Bi-Acetylated NOSO-95C<br>Mono-Acetylated NOSO-95C<br>Bi-Acetylated NOSO-95C |

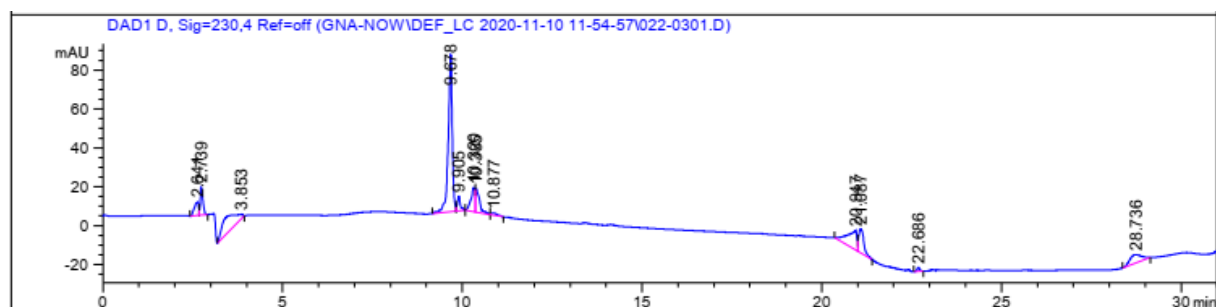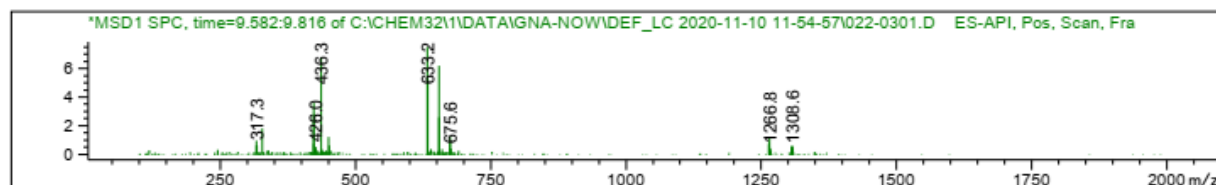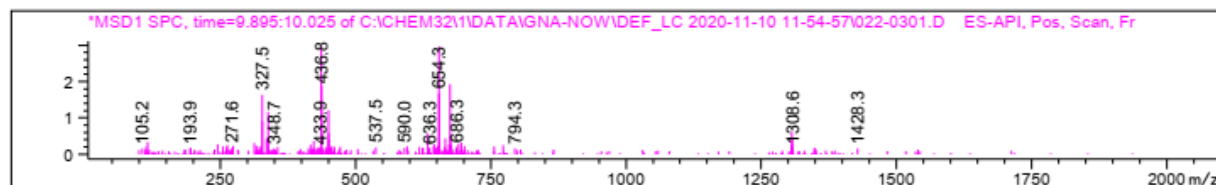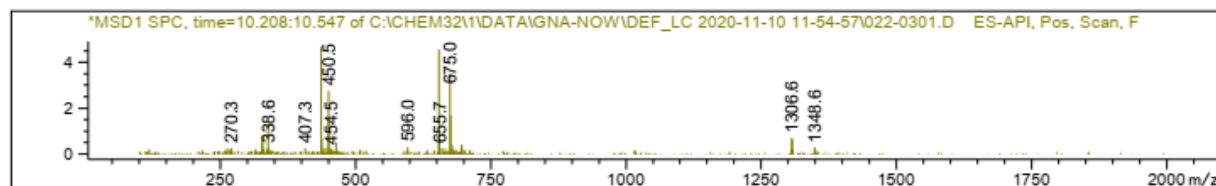

### C: Odilorhabdin acetyltransferase A (OatA)+ NOSO-95C (400 µg/mL)

- Incubation time: 15 min

| Retention time (min) | Peak Area (230 nm) | Ion mass                                                    | Proposed compound    |
|----------------------|--------------------|-------------------------------------------------------------|----------------------|
| 9.68                 | 1084               | [M+H] <sup>+</sup> : 1265.4<br>[M+2H] <sup>2+</sup> : 633.0 | NOSO-95C<br>NOSO-95C |

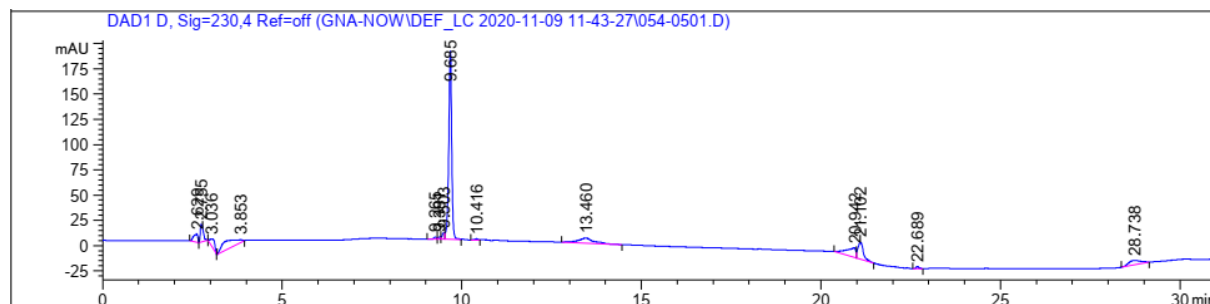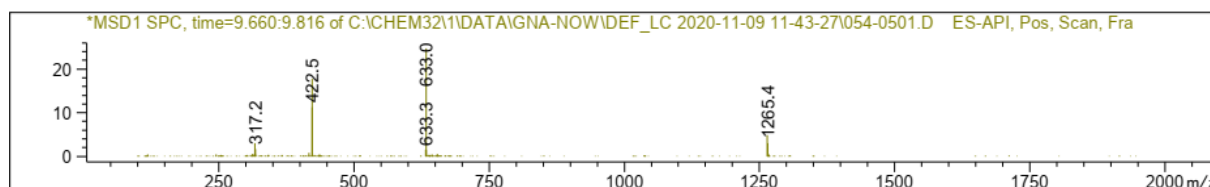

- Incubation time: 4h

| Retention time (min) | Peak Area (230 nm) | Ion mass                                                    | Proposed compound    |
|----------------------|--------------------|-------------------------------------------------------------|----------------------|
| 9.70                 | 1071               | [M+H] <sup>+</sup> : 1265.6<br>[M+2H] <sup>2+</sup> : 633.0 | NOSO-95C<br>NOSO-95C |

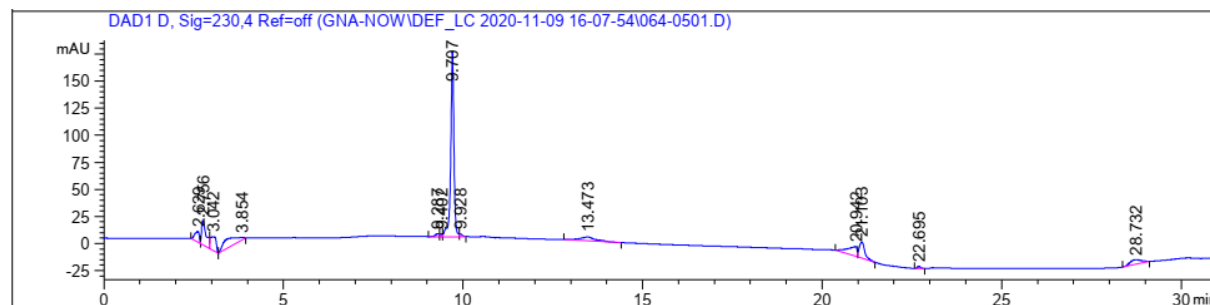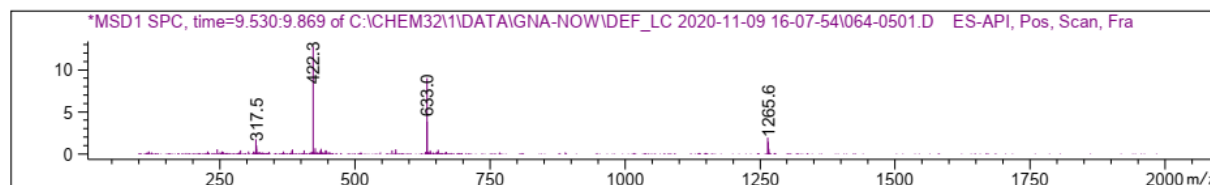

- Incubation time: 24h

| Retention time (min) | Peak Area (230 nm) | Ion mass                                                    | Proposed compound |
|----------------------|--------------------|-------------------------------------------------------------|-------------------|
| 9.64                 | 964                | [M+H] <sup>+</sup> : 1265.6<br>[M+2H] <sup>2+</sup> : 633.2 | NOSO-95C          |

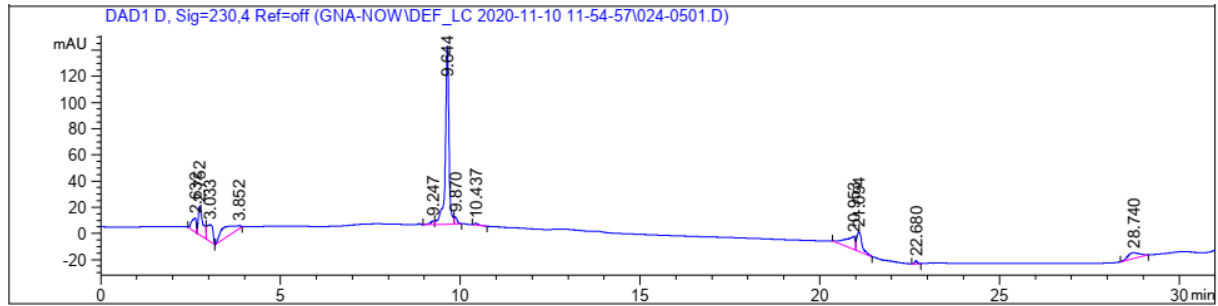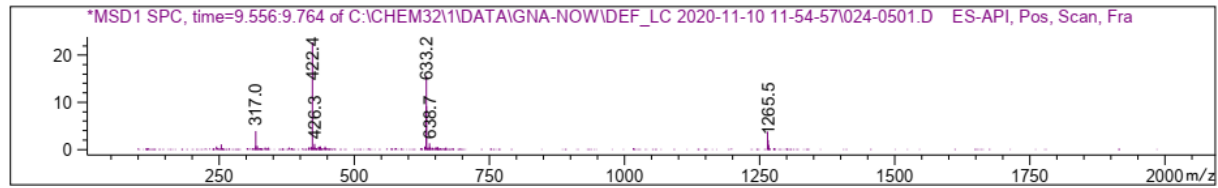

Supplement: mbio.02826-21-sf004.pdf [file mbio.02826-21-sf004.pdf]
