# Supplementary material for: The Odilorhabdin Antibiotic Biosynthetic Cluster and Acetyltransferase Self-Resistance Locus Are Niche and Species Specific
Source: PubMed Central journal article supplement (PMC8749412; doi:10.1128/mbio.02826-21), 2022-01-11

**Fig. S6. Characterization of OatA activity against a NOSO-95179 analog.** (A) LCMS analysis of NOSO-95179 (m/z: 1022) acetylated derivatives after 24 h of reaction with acetyl-CoA and odorhabdin acetyltransferase A (OatA): the form present was 100% mono-acetylated (m/z: 1064). (B) MS/MS fragmentation analysis of mono-acetylated NOSO-95179 (m/z: 1064): acetylation of the amine group on Dab( $\beta$ OH)<sub>2</sub>. (C) Antibacterial activity assay for NOSO-95179 after 24 h of reaction with acetyl-CoA (1), and OatA (2), or both (3) against *E. coli* ATCC2592. (D) Inhibition of synthesis of the GFP reporter protein in the *E. coli* cell-free transcription-translation system by NOSO-95179 after 24 h of reaction with acetyl-CoA, OatA, or both. Gentamicin (10  $\mu$ M) was used as a positive control. The data shown are the means of three experiments  $\pm$  SD.

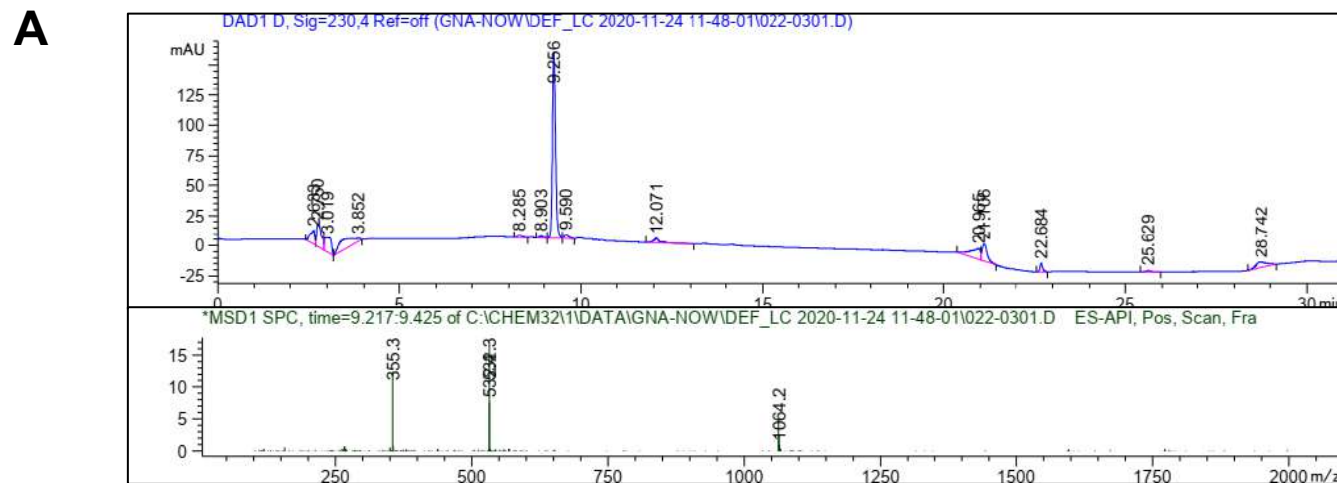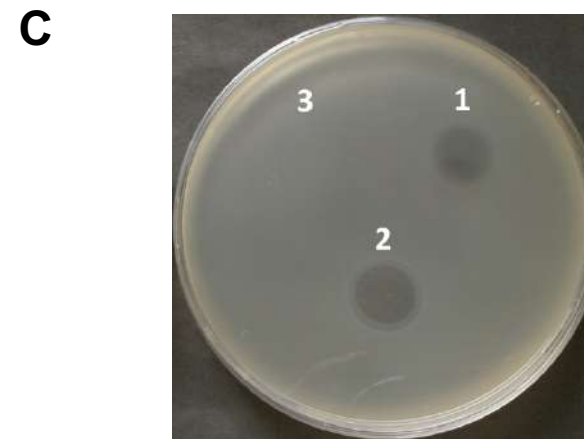

**B**

| Ion                  | m/z   | Neutral loss from previous ion | Attribution                     | Assigned Structure                                 |
|----------------------|-------|--------------------------------|---------------------------------|----------------------------------------------------|
| [M+2H] <sup>2+</sup> | 532   |                                |                                 | Lys-AcDab( $\beta$ OH)-Ala-Gly-Orn-Pro-His-Lys-Dha |
| y <sub>8</sub>       | 935.5 | 129                            | Lys <sub>1</sub>                | AcDab( $\beta$ OH)-Ala-Gly-Orn-Pro-His-Lys-Dha     |
| y <sub>7</sub>       | 777.4 | 158                            | AcDab( $\beta$ OH) <sub>2</sub> | Ala-Gly-Orn-Pro-His-Lys-Dha                        |
| y <sub>6</sub>       | 706.4 | 71                             | Ala <sub>3</sub>                | Gly-Orn-Pro-His-Lys-Dha                            |
| y <sub>5</sub>       | 649.4 | 57                             | Gly <sub>4</sub>                | Orn-Pro-His-Lys-Dha                                |
| y <sub>4</sub>       | 535.3 | 114                            | Orn <sub>5</sub>                | Pro-His-Lys-Dha                                    |
| y <sub>3</sub>       | 438.3 | 97                             | Pro <sub>6</sub>                | His-Lys-Dha                                        |

Abbreviation: **Ac**, acetyl group.

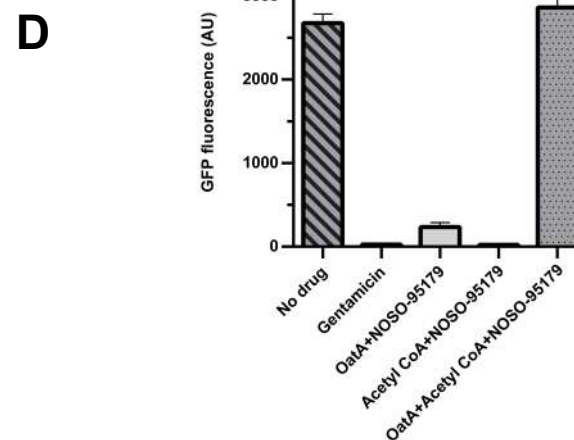

Supplement: mbio.02826-21-sf006.pdf [file mbio.02826-21-sf006.pdf]
