# Supplementary material for: The Odilorhabdin Antibiotic Biosynthetic Cluster and Acetyltransferase Self-Resistance Locus Are Niche and Species Specific
Source: PubMed Central journal article supplement (PMC8749412; doi:10.1128/mbio.02826-21), 2022-01-11

**Fig. S7. Microarray analysis.** Oligonucleotide probe selection and odorhabdin microarray synthesis. Two or three 60-mer oligonucleotide probes were designed by Imaxio (Biopôle Clermont-Limagne, 63360 Saint-Beauzire, France) for each NRPS-PKS genomic module or non-module gene of the ODL-BGC from *X. nematophila* ATCC19061 and *P. laumondii* TT01. The oligonucleotide probes have a mean  $T_m$  of 80.37 °C (+/-2.25°C), a mean GC% of 43.33 and no significant match elsewhere on the two bacterial genomes (less than 80% similarity over 30 nucleotides) to prevent cross-hybridization. Microarrays (8x15K) were synthesized with Agilent ink-jet technology (Agilent Technologies, Inc., Santa Clara, CA). Genomic DNA extraction, microarray hybridization and microarray image analysis. We obtained bacterial genomic DNA for 77 strains from the DGIMI laboratory collection according to the method of Brenner et al. (1982) (1). For each genomic DNA, 0.5 µg of material was hydrolyzed with *AluI* and *RsaI*, denatured for 5 min at 95°C and Cy3-labeled with the Genomic DNA Enzymatic Labeling Kit (Agilent Technologies) according to the manufacturer's recommendations. Labeled targets were purified with Amicon 30 kDa columns (Millipore) and displayed a specific activity of 23 to 45 pmol Cy3/µg. The Cy3-labeled genomic DNA was hybridized with the 60-mer oligonucleotide microarray at 65°C for 24 hours. The arrays were scanned with Agilent Scanner (laser constant intensity) with the following settings: Dynamic AutoFocus, PMT Cy3 100%, 20 bit-data format, pixel resolution 5 µm. Microarray image files were extracted after intra-array normalization with Feature Extraction 10.7.3 software (Agilent Technologies). The mean background signal was calculated with the negative controls and subtracted from the mean signal for each spot. ODL biosynthesis gene distribution and profile clustering. After normalization and background correction, a sequence was considered present in the target genome if the hybridization signal intensity exceeded 1000 for at least one of the probes. The hybridization profiles of each strain were transformed into binary numerical values (0: gene absent; 1: gene present). The dendrogram was generated by a hierarchical analysis of the distribution patterns (presence/absence) of the ODL-targeted probes according to the unweighted pair group method arithmetic mean (UPGMA) distance method and the Gower similarity coefficient (2), with Bionumerics software version 4.5 (Applied-Maths, Sint-Martens-Latem, Belgium). The taxonomic identities of the 77 strains used for hybridization experiment are shown on the right side of the dendrogram. The names of the NRPS-PKS genomic modules or non-module genes of the ODL-BGC are shown at the top of the dendrogram.

#### References :

1. Brenner DJ, McWhorter AC, Knutson JKL, Steigerwalt AG. 1982. *Escherichia vulneris*: a New Species of Enterobacteriaceae Associated with Human Wounds. *Journal of Clinical Microbiology* 15:1133–1140.
2. Gower JC, Legendre P. 1986. Metric and Euclidean properties of dissimilarity coefficients. *Journal of Classification* 3:5–48.

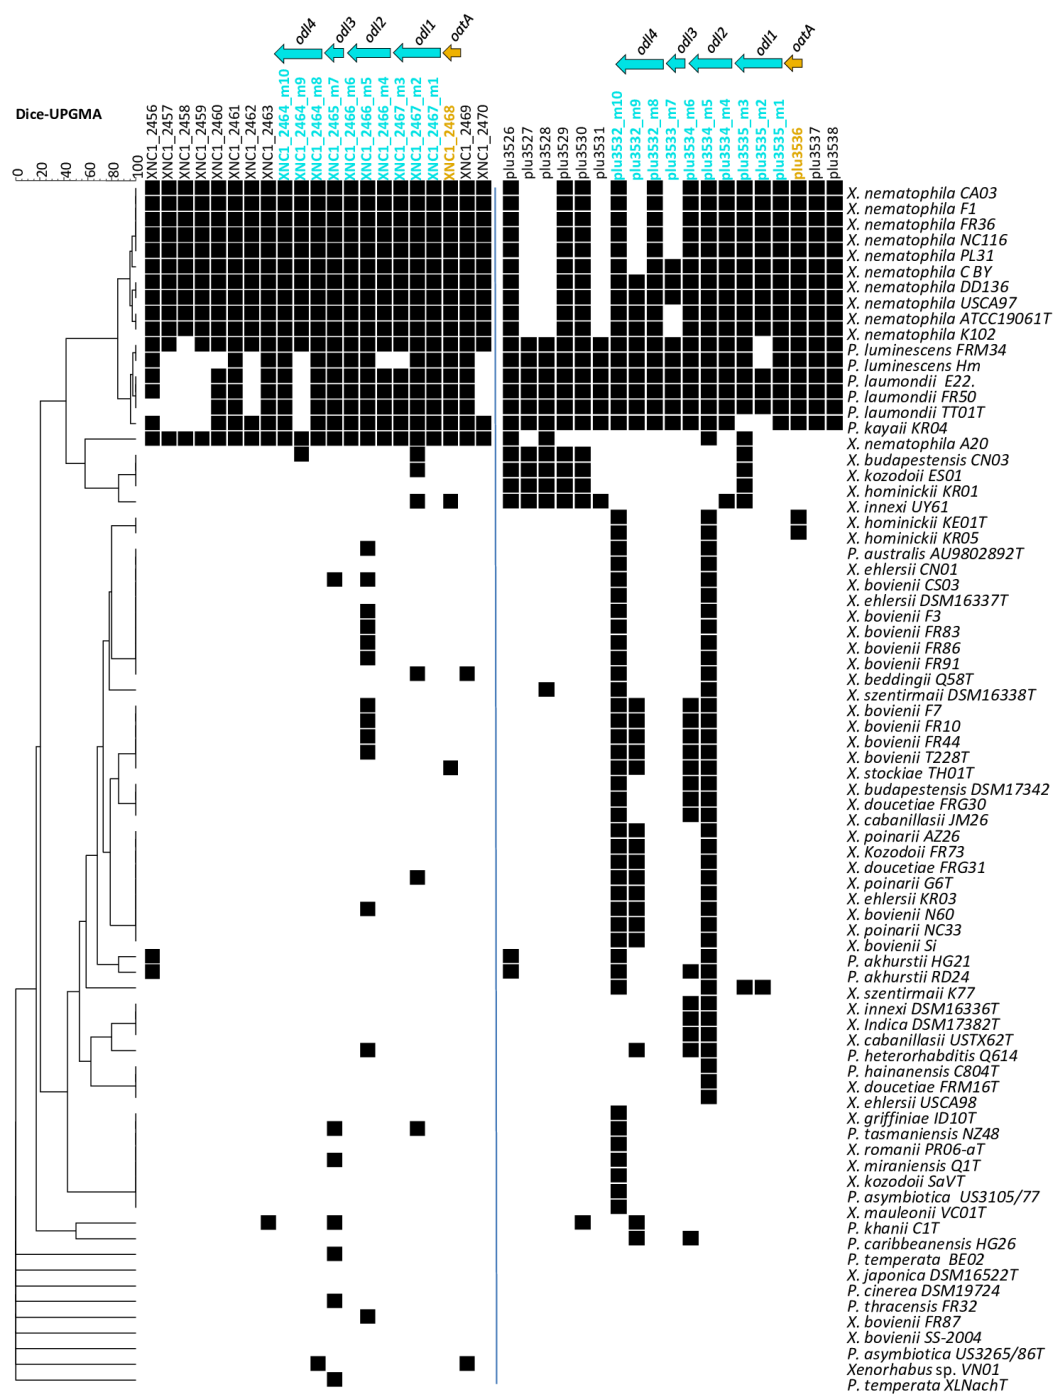

Supplement: mbio.02826-21-sf007.pdf [file mbio.02826-21-sf007.pdf]
