# Supplementary material for: The Odilorhabdin Antibiotic Biosynthetic Cluster and Acetyltransferase Self-Resistance Locus Are Niche and Species Specific
Source: PubMed Central journal article supplement (PMC8749412; doi:10.1128/mbio.02826-21), 2022-01-11

**Fig. S1.** LC-MS analysis of *X. nematophila* WT, mutants and complemented strains for the production of odorhabdins (NOSO-95A, B and C) and Xenocoumacin. Supernatants from 96h-cultures (or 78h-cultures from complemented strains) were filtered onto 0.2 $\mu$ m and analyzed as previously described in Methods by LC-MS at 210 nm with molecular masses from 630 to 650 (for ODLs) and from 465 to 467 (for Xcn 1) after extracted ion chromatographic (EIC) analysis.

*X. nematophila* WT

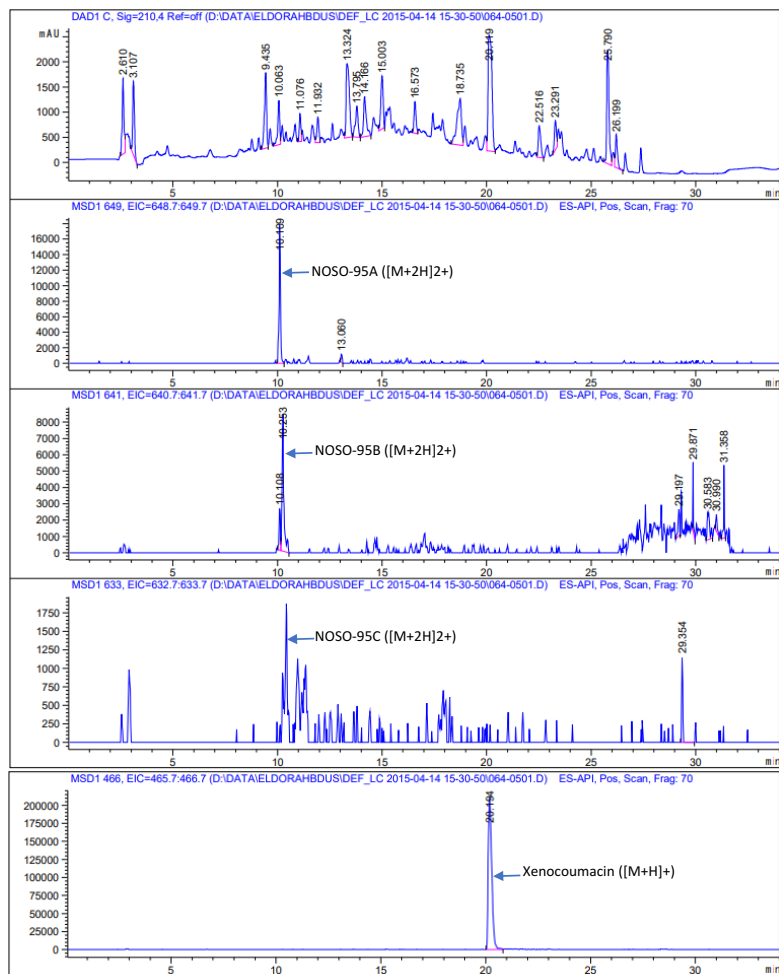

$\Delta$ *xcnKL*

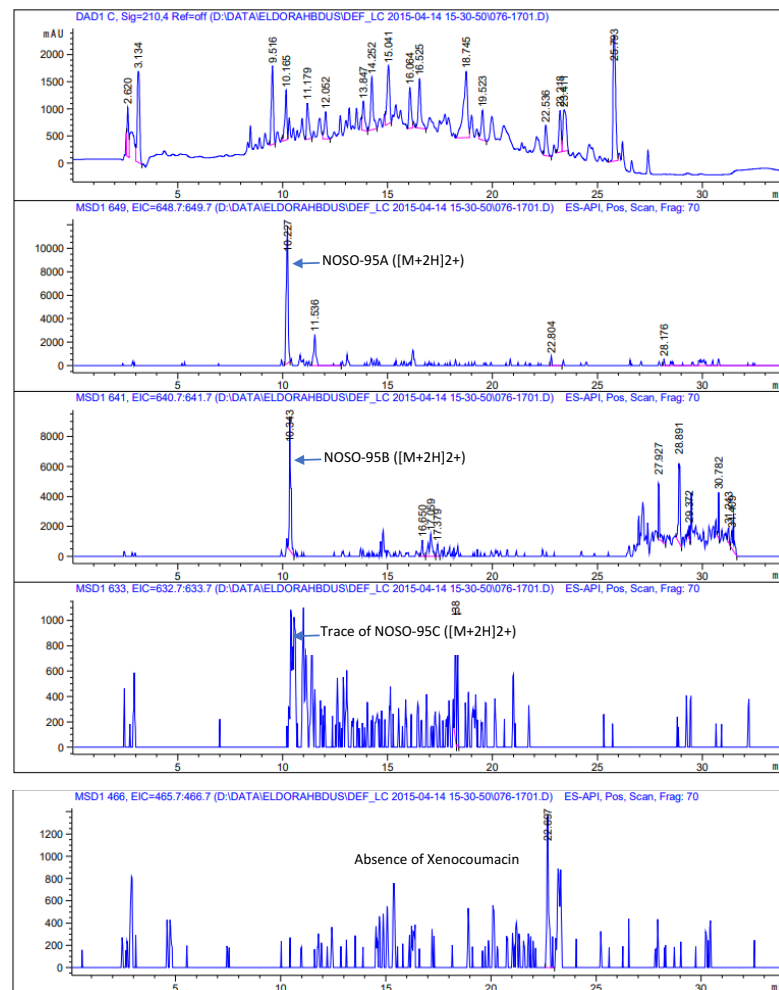

$\Delta$ *od1*

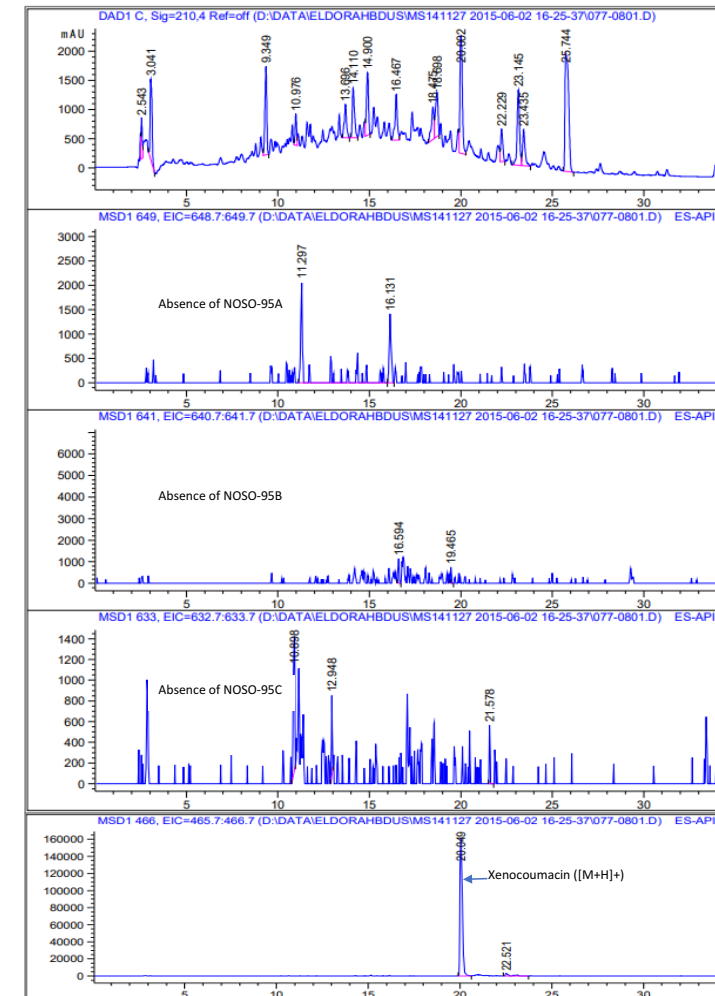

$\Delta xcnKL :: odl1$

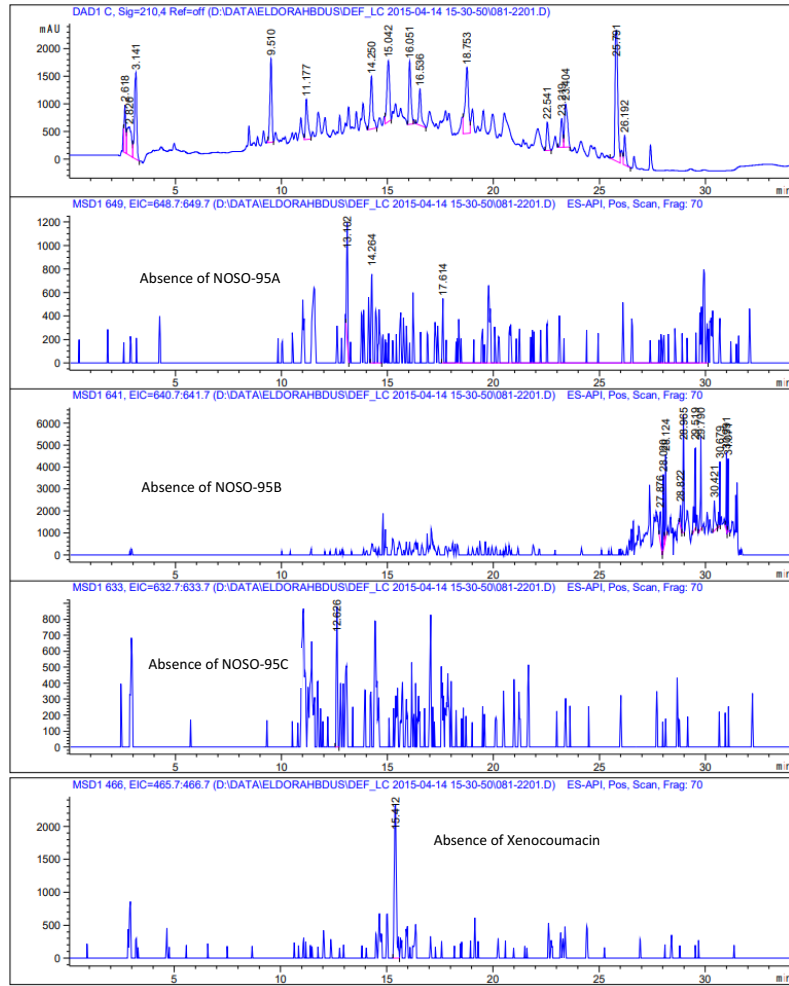

$\Delta xcnKL :: odl1$  (pBBR1-MCS5) + aTc

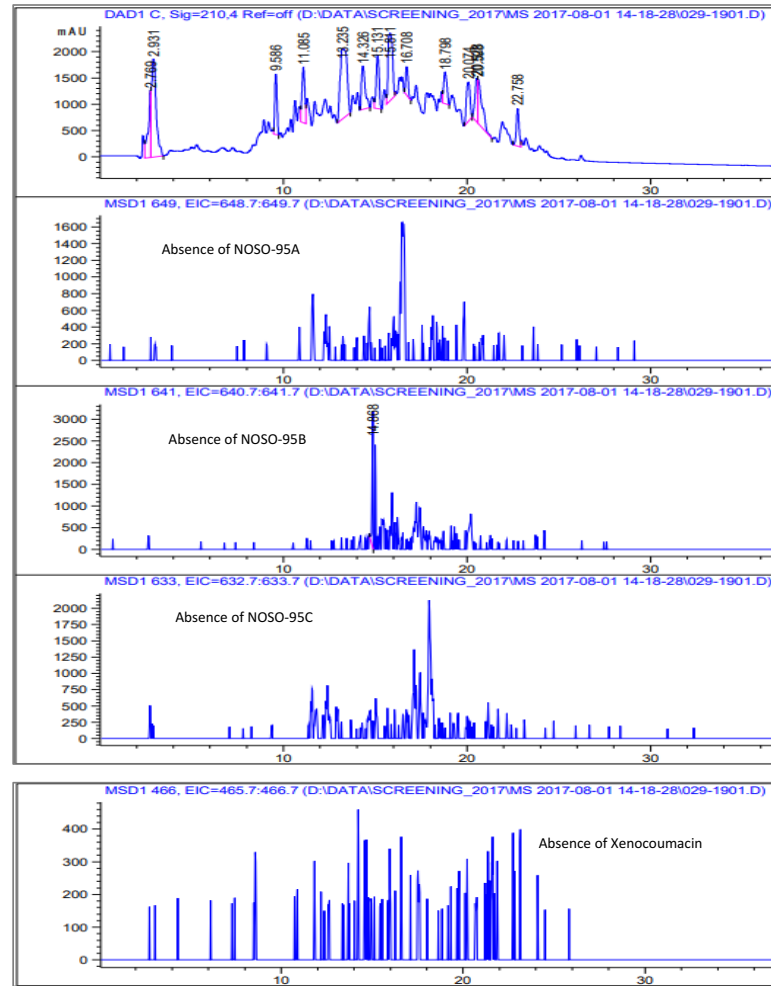

$\Delta xcnKL :: odl1$  (p15A- $P_{tet}$ -*odl*-BGC-mob) + aTc

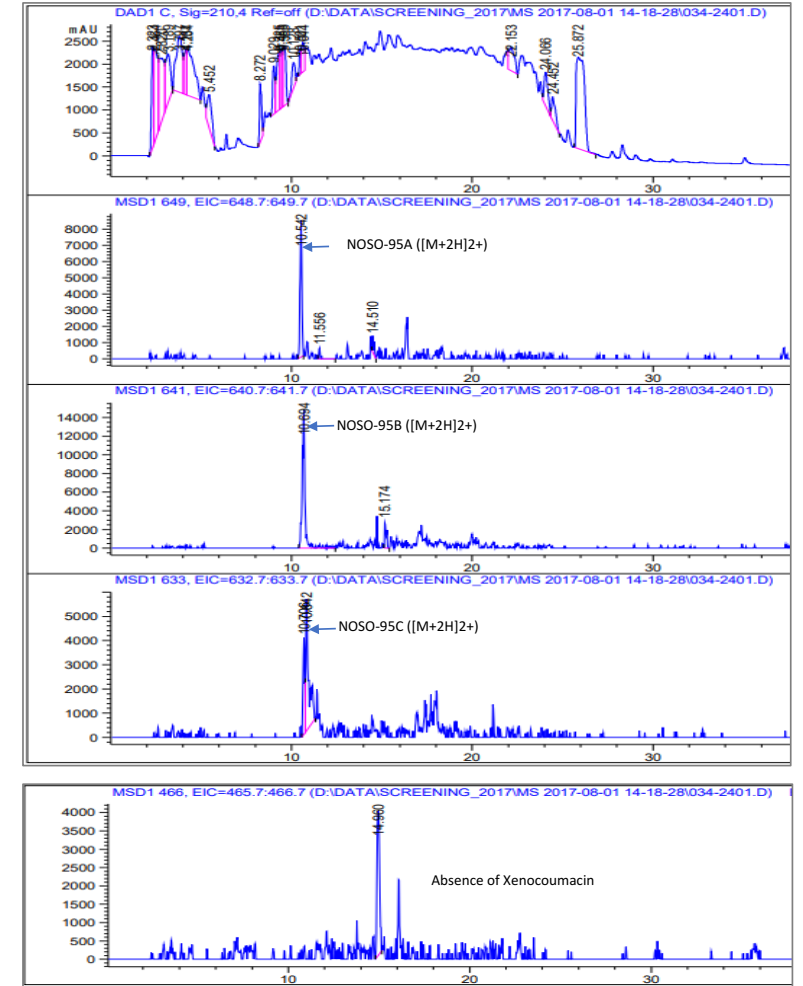

XL1 (pBB-*ngrA*) (pACYC184) + aTc

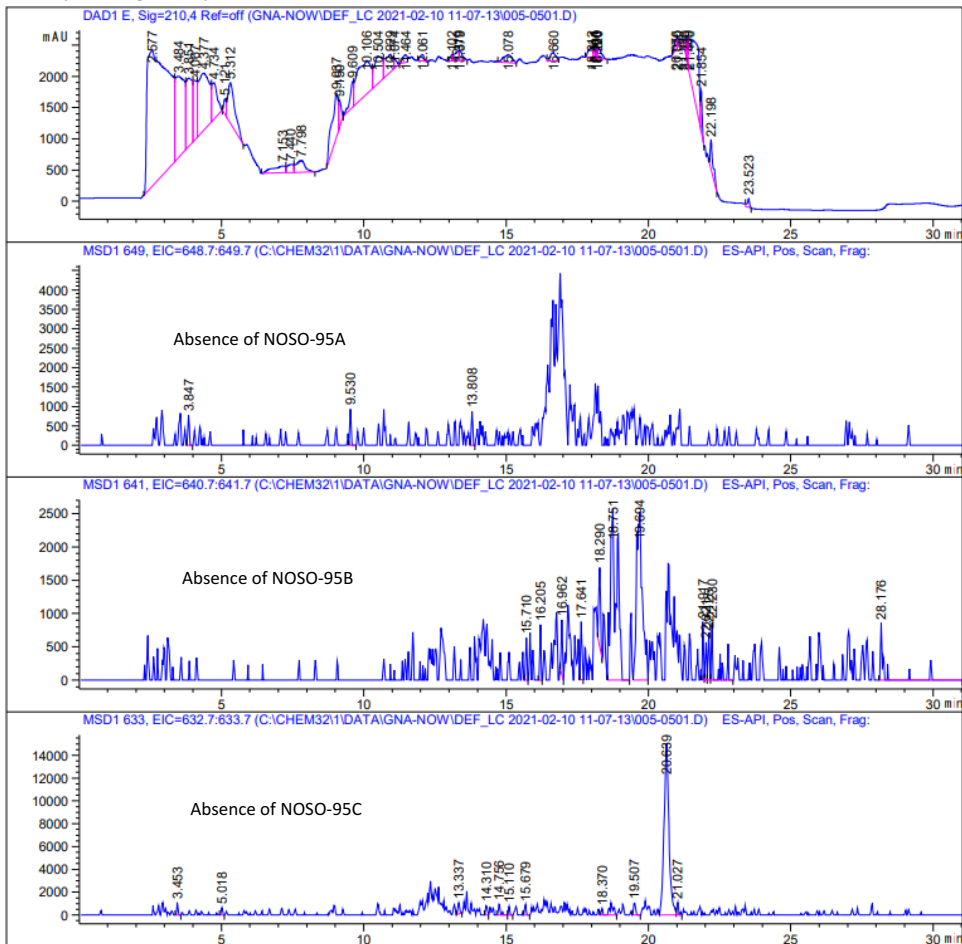

XL1 (pBB-*ngrA*) (p15A-P<sub>tet</sub>-*odl*-BGC) + aTc

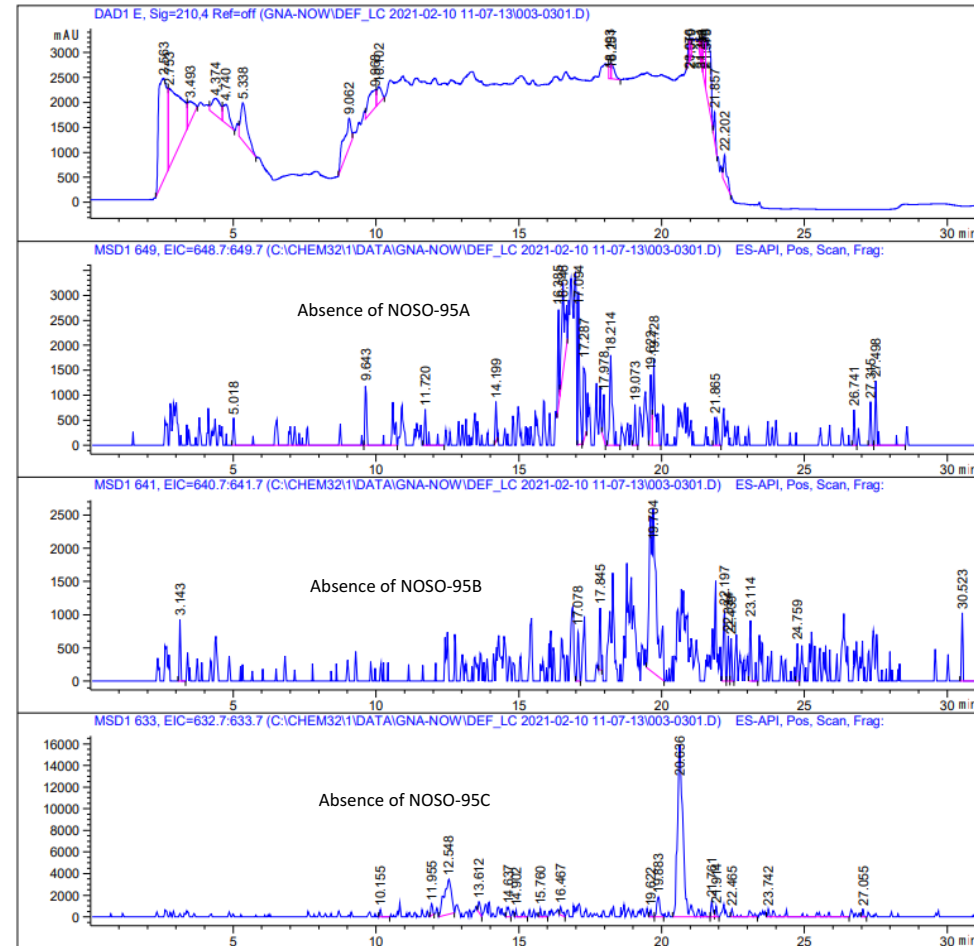

Supplement: mbio.02826-21-sf001.pdf [file mbio.02826-21-sf001.pdf]
