# Supplementary material for: The Odilorhabdin Antibiotic Biosynthetic Cluster and Acetyltransferase Self-Resistance Locus Are Niche and Species Specific
Source: PubMed Central journal article supplement (PMC8749412; doi:10.1128/mbio.02826-21), 2022-01-11

**Fig. S5. Fragmentation (MS/MS) spectrum** of NOSO-95C (m/z 1265) (A), mono-acetylated NOSO-95C (m/z 1307) (B), bi-acetylated NOSO-95C (m/z 1349) (C), and tri-acetylated NOSO-95C (m/z 1391) (D). After *in vitro* acetylation, LC-MS/MS was performed as described in Methods.

**A. NOSO-95C**

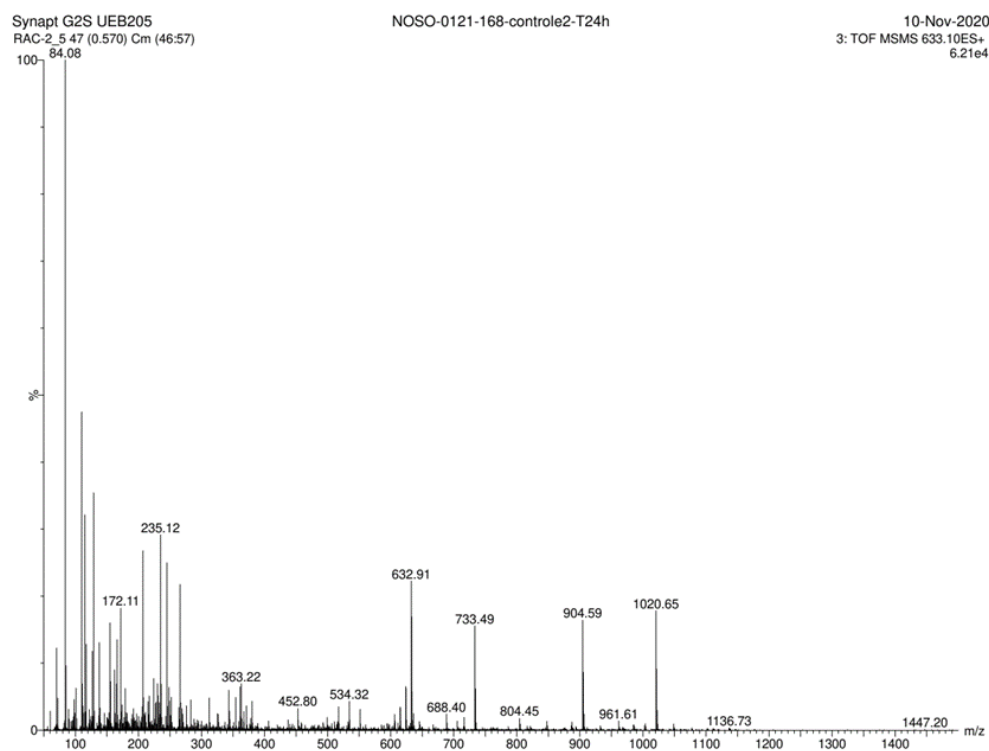

## B. Mono-acetylated NOSO-95C

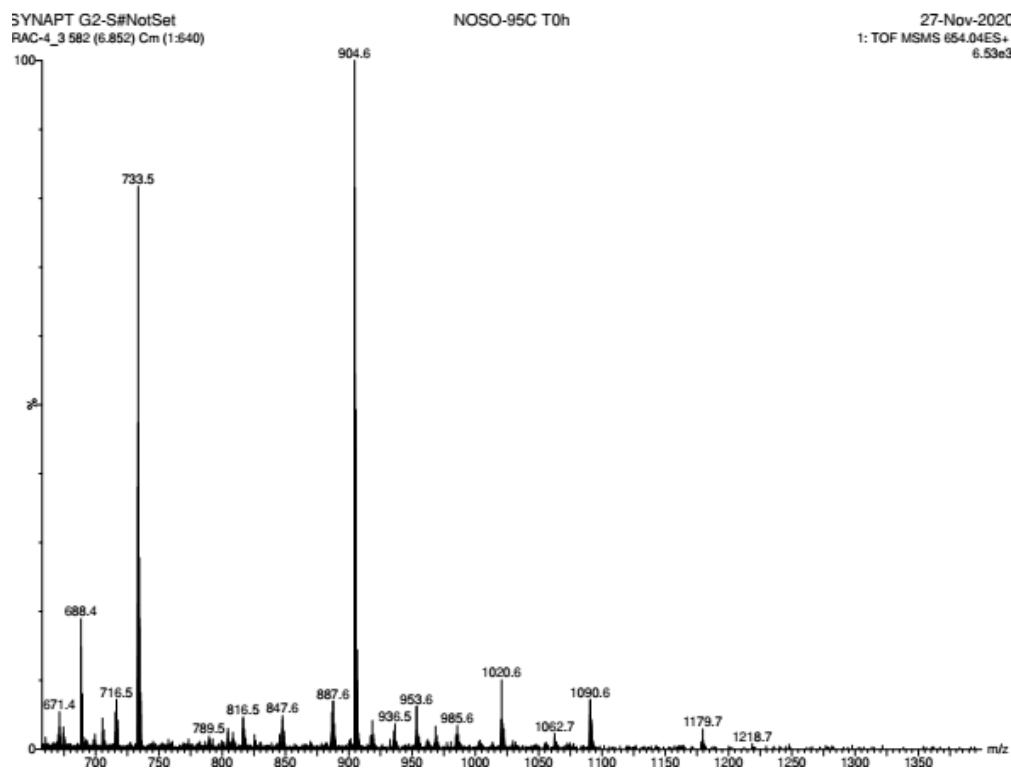

## C. Bi-acetylated NOSO-95C

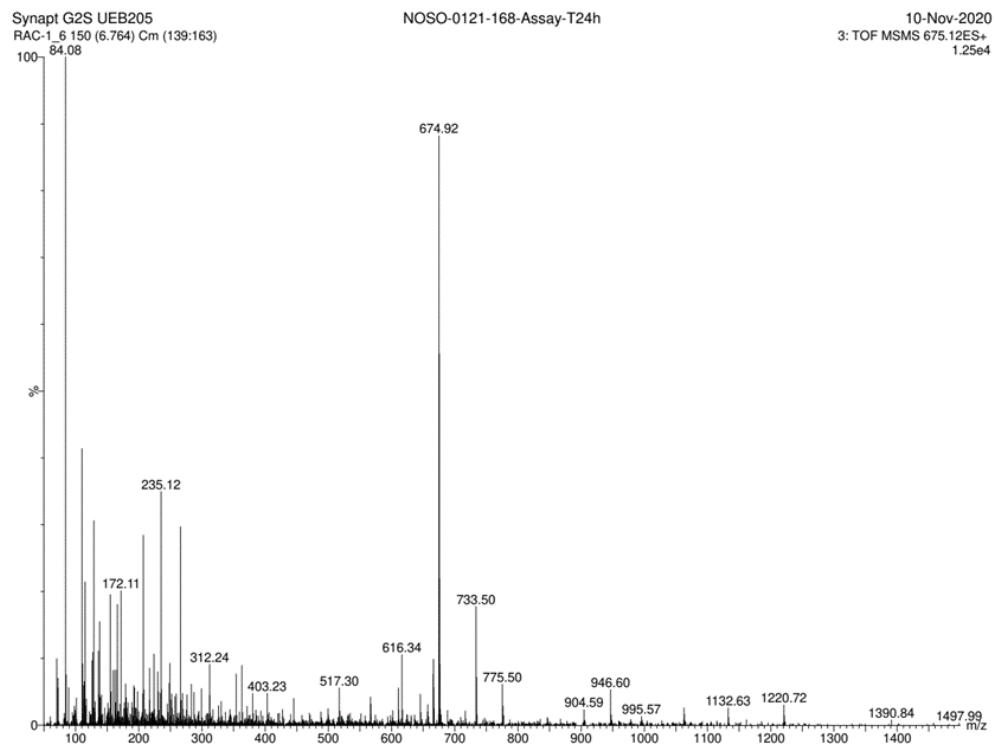

# D. Tri-acetylated NOSO-95C

Synapt G2S UEB205  
RAC-1\_6 146 (6.710) Cm (125:150)

NOSO-0121-168-Assay-T24h

10-Nov-2020  
2: TOF MSMS 696.13ES+  
6.44e4

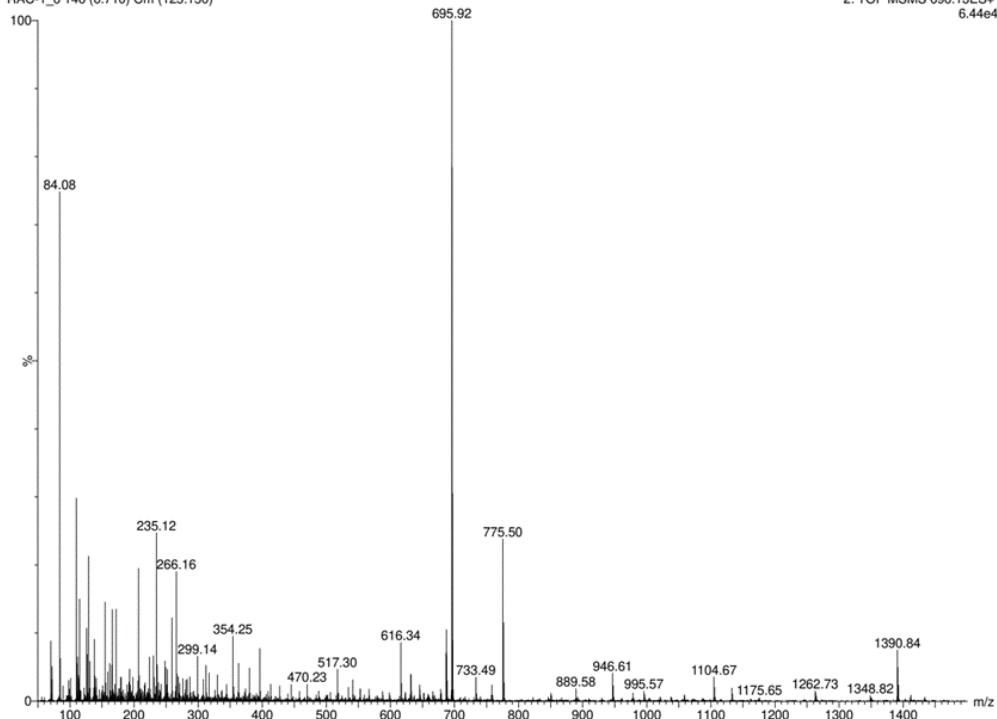

Supplement: mbio.02826-21-sf005.pdf [file mbio.02826-21-sf005.pdf]
