# Supplementary material for: The Odilorhabdin Antibiotic Biosynthetic Cluster and Acetyltransferase Self-Resistance Locus Are Niche and Species Specific
Source: PubMed Central journal article supplement (PMC8749412; doi:10.1128/mbio.02826-21), 2022-01-11

**Fig. S8.** Pseudogenization of the *oatA*-like gene in the genomes of the strains from *Xenorhabdus* clade C-IV.

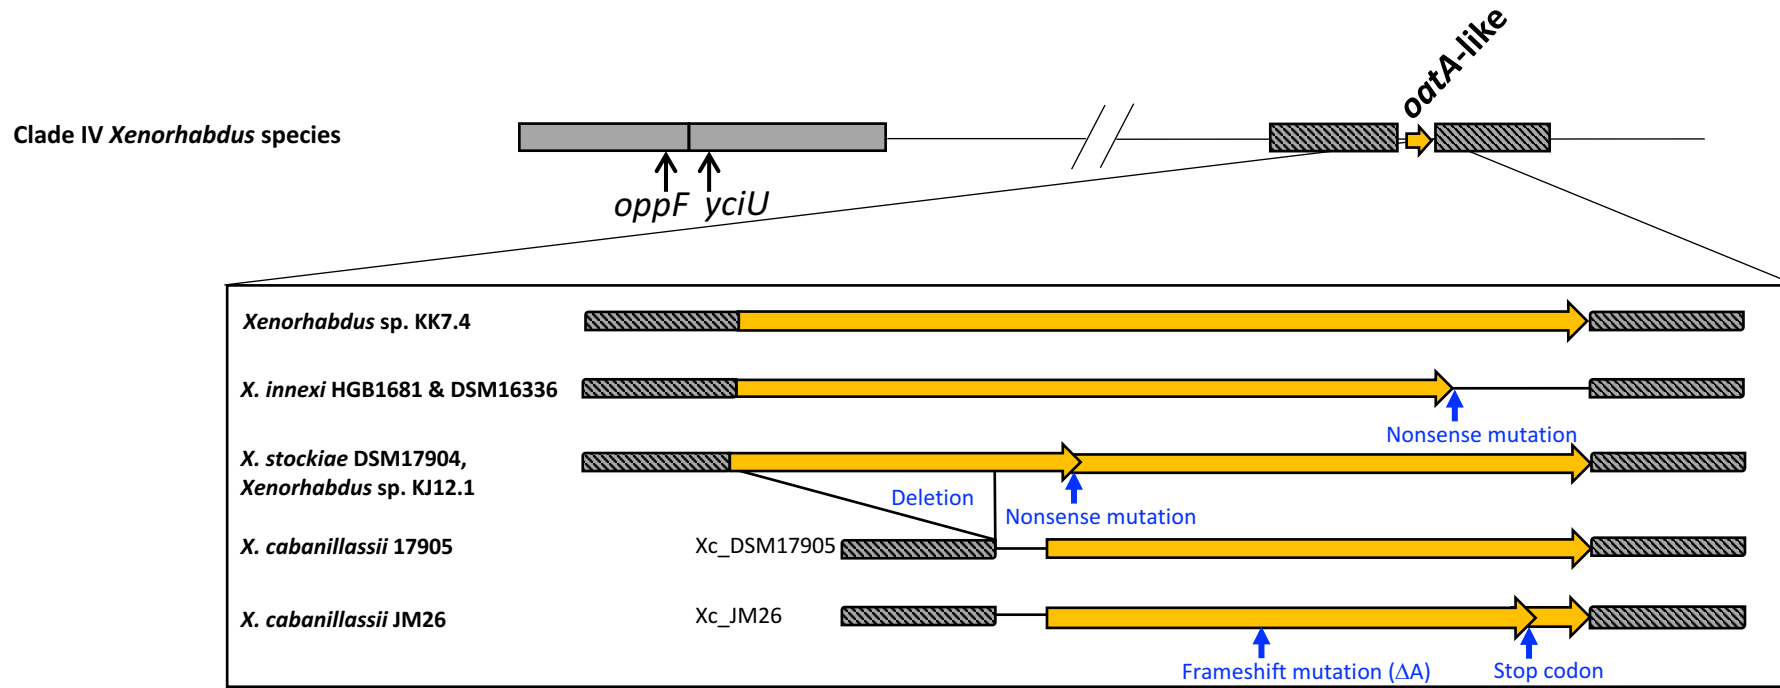

Supplement: mbio.02826-21-sf008.pdf [file mbio.02826-21-sf008.pdf]
