# Supplementary material for: The Odilorhabdin Antibiotic Biosynthetic Cluster and Acetyltransferase Self-Resistance Locus Are Niche and Species Specific
Source: PubMed Central journal article supplement (PMC8749412; doi:10.1128/mbio.02826-21), 2022-01-11
Supplement: mbio.02826-21-st001.pdf [file mbio.02826-21-st001.pdf]

**Table S1. Strains and plasmids used in this study.**

| Strain or plasmid                           | Genotype and relevant characteristics                                                                                                                                                                                                                                           | Reference or source   |
|---------------------------------------------|---------------------------------------------------------------------------------------------------------------------------------------------------------------------------------------------------------------------------------------------------------------------------------|-----------------------|
| <b>Strains</b>                              |                                                                                                                                                                                                                                                                                 |                       |
| <i>Xenorhabdus nematophila</i>              |                                                                                                                                                                                                                                                                                 |                       |
| K102 (CNCMI-4530)                           | Wild type isolated from <i>Steinernema carpocapsae</i> nematode                                                                                                                                                                                                                 | Laboratory collection |
| AN6 WT                                      | Wild type isolated from <i>Steinernema carpocapsae</i> nematode                                                                                                                                                                                                                 | (1)                   |
| $\Delta xcnKL::F$                           | AN6/1 $\Delta xcnKL::Km^R$ XNC1_2467:: $Cm^R$ named also $\Delta xcnKL::odl1$                                                                                                                                                                                                   | (1)                   |
| F1                                          | Wild type isolated from <i>Steinernema carpocapsae</i> nematode Plougastel (Brittany)                                                                                                                                                                                           | Laboratory collection |
| $\Delta ngrA$                               | F1 $ngrA::\Omega Cm$                                                                                                                                                                                                                                                            | This study            |
| $\Delta ngrA \Delta oatA$                   | F1 $ngrA::\Omega Cm$ $oatA::Km$                                                                                                                                                                                                                                                 | This study            |
| <i>Escherichia coli</i>                     |                                                                                                                                                                                                                                                                                 |                       |
| GB05-dir                                    | <i>E. coli</i> DH10B derived strain containing the arabinose inducible ET $\gamma$ A operon (full length <i>recE</i> , <i>recT</i> , <i>red<math>\gamma</math></i> and <i>recA</i> ) inserted at the <i>ybcC</i> locus allowing LLHR                                            | Gene Bridges GmbH     |
| GB08-dir                                    | <i>E. coli</i> DH10B derived strain containing the arabinose inducible $\gamma\beta\alpha$ A operon (full length <i>red<math>\gamma</math></i> , <i>red<math>\beta</math></i> , <i>red<math>\alpha</math></i> and <i>recA</i> ) inserted at the <i>ybcC</i> locus allowing LCHR | Gene Bridges GmbH     |
| XL1-Blue MRF'                               | $\Delta(mcrA)183 \Delta(mcrCB-hsdSMR-mrr)173 endA1 supE44 thi-1 recA1 gyrA96 relA1 lac$ [F' <i>proAB lacIqZ</i> $\Delta$ M15 Tn10 (Tetr)]                                                                                                                                       | Stratagene            |
| WM3064                                      | <i>thrB1004 pro thi rpsI hsdS lacZ</i> $\Delta$ M15 RP4-1360 $\Delta(araBAD)567 \Delta dapA134I::[erm pir (wt)]$ donor strain                                                                                                                                                   | (2)                   |
| BL21(DE3)                                   | F <sup>-</sup> <i>ompT hsdSB (rB- mB-) gal dcm lon <math>\lambda</math></i> (DE3 [ <i>lacI lacUV5-T7 gene 1 indI sam7 nin5</i> ])                                                                                                                                               | Laboratory collection |
| <b>Plasmids</b>                             |                                                                                                                                                                                                                                                                                 |                       |
| p15A-Cm                                     | p15A origin 2kb plasmid $Cm^R$                                                                                                                                                                                                                                                  | (3)                   |
| p15A- <i>odl</i> -BGC                       | <i>X. nematophila</i> odilorhabdin locus red/ET cloned into p15A-Cm                                                                                                                                                                                                             | This study            |
| pSC101-tetR-tetO-eGFP-Km                    | pSC101 vector containing $Km^R$ - <i>Tet<sup>R</sup></i> - P <sub>LtetO-1</sub>                                                                                                                                                                                                 | (3)                   |
| p15A-P <sub>tet</sub> - <i>odl</i> -BGC     | $Km^R$ - <i>Tet<sup>R</sup></i> - P <sub>LtetO-1</sub> from pSC101-tetR-tetO-eGFP-km red/ET cloned into p15A- <i>odl</i> -BGC                                                                                                                                                   | This study            |
| pACYC184                                    | p15A origin plasmid                                                                                                                                                                                                                                                             | Laboratory collection |
| pBBR1-MCS5                                  | Broad host range vector $Gm^R$ , mob                                                                                                                                                                                                                                            | (4)                   |
| p15A-P <sub>tet</sub> - <i>odl</i> -BGC-mob | $Gm^R$ -mob fragment from pBBR1-MCS5 red/ET cloned into p15A-P <sub>tet</sub> - <i>odl</i> -BGC                                                                                                                                                                                 | This study            |
| pJQ200SK                                    | $Gm^r$ <i>sacRB</i> mob oriV (p15A replicon) suicide plasmid                                                                                                                                                                                                                    | S. Forst              |
| pJQ- <i>ngrA</i> :: $\Omega Cm$             | pJQ suicide plasmid carrying the $\Omega$ Cam interposon cloned between the two regions upstream and downstream of the <i>ngrA</i> gene                                                                                                                                         | This study            |
| pBBR1-MCS2                                  | Broad host range vector $Km^R$ , mob                                                                                                                                                                                                                                            | (4)                   |
| pBB- <i>ngrA</i>                            | <i>X. nematophila ngrA</i> gene PCR fragment cloned into pBBR1-MCS2                                                                                                                                                                                                             | This study            |
| pJQ-KmT1                                    | pJQ200SK carrying a kanamycin resistance cassette and T1 terminator region from pPROBE-AAV                                                                                                                                                                                      | (5)                   |
| pJQ- <i>oatA</i> ::KmT1                     | pJQ suicide plasmid carrying a kanamycin resistance cassette and T1 terminator region from pPROBE- <i>gfp</i> [AAV] cloned between the two regions upstream and downstream of the <i>X. nematophila oatA</i> gene                                                               | This study            |
| pET-28a                                     | pBr322 origin, T7 promoter, $Kan^R$                                                                                                                                                                                                                                             | Novagen               |
| pET- <i>oatA</i>                            | pET-28a with <i>oatA</i> (His-tag) in N-term under the control of T7 promoter, $Kan^R$                                                                                                                                                                                          | This study            |
| pUC19                                       | Ap <sup>R</sup> cloning vector                                                                                                                                                                                                                                                  | Biolabs               |
| P <sub>lac</sub> - <i>defghij</i>           | Seven downstream genes from <i>odl</i> -BGC-locus cloned into pUC19                                                                                                                                                                                                             | This study            |
| P <sub>lac</sub> - <i>abc</i>               | Three upstream genes from <i>odl</i> -BGC-locus cloned into pUC19                                                                                                                                                                                                               | This study            |
| P <sub>lac</sub> - <i>a</i>                 | <i>ectB</i> gene (=a gene) cloned into pUC19                                                                                                                                                                                                                                    | This study            |
| P <sub>lac</sub> - <i>b</i>                 | <i>b</i> gene cloned into pUC19                                                                                                                                                                                                                                                 | This study            |
| P <sub>lac</sub> - <i>oatA</i> -Xn          | odilorhabdin acetyltransferase gene (=c gene) from <i>X. nematophila</i> cloned into pUC19                                                                                                                                                                                      | This study            |

LLHR (linear plus linear homologous recombination)

LCHR (linear plus circular homologous recombination)

## References:

1. Singh S, Orr D, Divinagracia E, McGraw J, Dorff K, Forst S. 2015. Role of Secondary Metabolites in Establishment of the Mutualistic Partnership between *Xenorhabdus nematophila* and the Entomopathogenic Nematode *Steinernema carpocapsae*. *Appl Environ Microbiol* 81:754–764.
2. Paulick A, Koerdt A, Lassak J, Huntley S, Wilms I, Narberhaus F, Thormann KM. 2009. Two different stator systems drive a single polar flagellum in *Shewanella oneidensis* MR-1. *Molecular Microbiology* 71:836–850.
3. Fu J, Bian X, Hu S, Wang H, Huang F, Seibert PM, Plaza A, Xia L, Müller R, Stewart AF, Zhang Y. 2012. Full-length RecE enhances linear-linear homologous recombination and facilitates direct cloning for bioprospecting. *Nature Biotechnology* 30:440–446.
4. Kovach ME, Elzer PH, Steven Hill D, Robertson GT, Farris MA, Roop RM, Peterson KM. 1995. Four new derivatives of the broad-host-range cloning vector pBBR1MCS, carrying different antibiotic-resistance cassettes. *Gene* 166:175–176.
5. Hadchity L, Lanois A, Kiwan P, Nassar F, Givaudan A, Abi Khattar Z. 2021. AcrAB, the major RND-type efflux pump of *Photorhabdus laumondii*, confers intrinsic multidrug-resistance and contributes to virulence in insects. *Environmental Microbiology Reports* 13:637–648.
