# Supplementary material for: The Odilorhabdin Antibiotic Biosynthetic Cluster and Acetyltransferase Self-Resistance Locus Are Niche and Species Specific
Source: PubMed Central journal article supplement (PMC8749412; doi:10.1128/mbio.02826-21), 2022-01-11
Supplement: mbio.02826-21-st002.pdf [file mbio.02826-21-st002.pdf]

**Table S2. Primers used in this study**

| Regions or genes                                                          | Primers                    | Sequences 5'-3'                                                                             | Length   |
|---------------------------------------------------------------------------|----------------------------|---------------------------------------------------------------------------------------------|----------|
| <i>ngrA</i> mutant construction                                           | L-PCR1- <i>ngrA</i> -XbaI  | GCGCTCTAGAGGCCAGTACTTCACGATTGG                                                              | 579 bp   |
|                                                                           | R-PCR1- <i>ngrA</i> -BamHI | GCGCGGATCCGGAACGGTCTTTGGCATTG                                                               |          |
| <i>ngrA</i> mutant verification                                           | L- <i>ngrA</i> 2bis-BamHI  | GCGGATCCCAATCGCACTGTGAACATCA                                                                | 522 bp   |
|                                                                           | R- <i>ngrA</i> 2bis-ApaI   | GCGGGCCCCAGTCATTGGTGGTTTGACG                                                                |          |
| <i>ngrA</i> gene                                                          | L- <i>ngrA</i> -mut        | CAGCAGCACAACAGACCAAT                                                                        | 6 kb     |
|                                                                           | L-PCR1- <i>ngrA</i> -XbaI  | GCGCTCTAGAGGCCAGTACTTCACGATTGG                                                              |          |
| <i>oatA</i> mutant construction                                           | L-SacI-b                   | GCGAGCTCATGTCATCGCACACTTGCTC                                                                | 595 bp   |
|                                                                           | R-SpeI- <i>oatA</i>        | GCACTAGGGCATGAGCAACATATCACC                                                                 |          |
| <i>oatA</i> mutant verification                                           | L-SalI- <i>oatA</i>        | GCGTCGACGGATCACCGTCTGCTATGAG                                                                | 611 bp   |
|                                                                           | R-ApaI- <i>odl1</i>        | GCGGGCCCAGATTCCGCCTCATCTCAC                                                                 |          |
| <i>oatA</i> mutant verification                                           | R-Km-PvuI                  | GCCGATCG TCATTTGCAACCCAGAGTC                                                                | 1791- bp |
|                                                                           | L-b-KpnI                   | GGCGGTACCCCGAAAGTCAAACCCAGAGA                                                               |          |
|                                                                           | M13-F                      | GTAAAACGACGGCCAG                                                                            | 3 kb     |
|                                                                           | R- <i>odl1</i> -F1q        | TTCTACAGAAATATCGAAGCTGACC                                                                   |          |
| p15A- <i>odl</i> -BGC Red/ET cloning (LLHR)                               | <i>odl</i> -bis1           | TTGTTCTGGTTTGGAAACGATGATACTAACATCAACC<br>CCCCGCATTGCGGCTGTACAAATGGTTACGCCCG<br>CCCTGCCACTC  | 44.5 kb  |
|                                                                           | <i>odl</i> -bis2           | CGGAAATGTTTCGACAATATGAACGAGCTTTTACT<br>CATAATTATTGAATATCTCTTCCACGGTAACGAATC<br>AGACAATTGACG |          |
| p15A- <i>P<sub>ter</sub></i> - <i>odl</i> -BGC Red/ET cloning (LCHR1)     | p15A- <i>odilo</i> -5      | TCTGCAAACCCTATGCTACTCCGTCAAGCCGTCAAT<br>TGCTGATTCTGTTACCTAATGCGGTAGTTTATCACA                | 2093 bp  |
|                                                                           | p15A- <i>odilo</i> -3      | AAATGTTTCGACAATATGAACGAGCTTTTACTCAT<br>AATTATTGAATATCTCTTCCACATGAATTCCTCTG<br>CTAGAT        |          |
| p15A- <i>P<sub>ter</sub></i> - <i>odl</i> -BGC-mob Red/ET cloning (LCHR2) | L-Gm-Km                    | ATAAATAAAATGGCGCCACAGGTGCGGTTGCTGGC<br>GCCTCGACCAAGTACCGCCAAGAGAGCGGTTTGC<br>GTATT          | 2786 bp  |
|                                                                           | R-oriV-Ptet                | CCGTTTCGTATAGCATAACATTATACGAAGTTATTCGG<br>CTTGAACGAATTGTTAGGGGGGCTTGTGATCGAC<br>TG          |          |
| <i>defghij</i> region                                                     | L-d-KpnI                   | GGCGGTACCTTTATGGGCGGTTGGTGTAT                                                               | 7205 bp  |
|                                                                           | R-j-SacI                   | GGCGAGCTCATTGGTTTAGCGGCATCGGA                                                               |          |
| <i>abc</i> region                                                         | L- <i>ectB</i> -KpnI       | GGCGGTACCAAAAAGAGGTTAAAGTGAAGAGA                                                            | 2764 bp  |
|                                                                           | R-c-SacI                   | GGCGAGCTCTCAAGTTACGGCTTCGTTG                                                                |          |
| <i>ectB</i> gene                                                          | L- <i>ectB</i> -KpnI       | GGCGGTACCAAAAAGAGGTTAAAGTGAAGAGA                                                            | 1395 bp  |
|                                                                           | R- <i>ectB</i> -SacI       | GGCGAGCTCTGCGATGACATTCATTCTGA                                                               |          |
| <i>b</i> gene                                                             | L-b-KpnI                   | GGCGGTACCCCGAAAGTCAAACCCAGAGA                                                               | 999 bp   |
|                                                                           | R-b-SacI                   | GGCGAGCTCGACACATCACATCTTCATAGTTGTC                                                          |          |
| <i>oatA</i> gene                                                          | L-c-KpnI                   | GGCGGTACCCCGTCCGTACCTTAATTATATTCT                                                           | 591 bp   |
|                                                                           | R-c-SacI                   | GGCGAGCTCTCAAGTTACGGCTTCGTTG                                                                |          |
| pET- <i>oatA</i>                                                          | F-Nterm- <i>oatA</i> -NdeI | GGCCATATGAAAGTAACTTTGACTGATGTG                                                              | 478 bp   |
|                                                                           | R-Stop- <i>oatA</i> -SalI  | GGCGTCGACTTGGGTATAGGATCATTA                                                                 |          |
| <i>oatA</i> <i>Photorhabdus</i>                                           | L- <i>oatA</i> -photo-KpnI | GGCGGTACCGTATCTTAATTATATTCTTAAA                                                             | 592 bp   |
|                                                                           | R- <i>oatA</i> -photo-SacI | GGCGAGCTCGGAATAACAAGCGGTTCAACTT                                                             |          |
| <i>oatA</i> -like <i>X. hominickii</i>                                    | L- <i>oatA</i> -xh-KpnI    | GGCGGTACCTCAAAGTATCTTCCGCACCTT                                                              | 589 bp   |
|                                                                           | R- <i>oatA</i> -xh-SacI    | GGCGAGCTCATAAGCGGGAGAGGCAGTTT                                                               |          |
| <i>oatA</i> -like <i>X. innexi</i>                                        | L- <i>oatA</i> -xi-KpnI    | GGCGGTACCTCAATAAACTGATGGCAATTACA                                                            | 473 bp   |
|                                                                           | R- <i>oatA</i> -xi-SacI    | GGCGAGCTCCATTTCTTCATGCTCATCAAA                                                              |          |
| <i>oatA</i> -like <i>X. cabanillassii</i>                                 | L- <i>oatA</i> -xc-KpnI    | GGCGGTACCTGTGATTCAAAGGGAGAGCA                                                               | 430 bp   |
|                                                                           | R- <i>oatA</i> -xc-SacI    | GGCGAGCTCATTCTTTTCGCAAGCTCCAG                                                               |          |
| <i>oatA</i> -like <i>X. stockiae</i>                                      | L- <i>oatA</i> -xs-KpnI    | GGCGGTACCTGGCTATTACATTGTGATTATGGA                                                           | 527 bp   |
|                                                                           | R- <i>oatA</i> -xs-SacI    | GGCGAGCTCTGTTTCATTTTAAAGAGAAGTTCACA                                                         |          |

In red : Forward homology arm

In blue : Reverse homology arm

| <b>Regions or genes</b> | <b>Primers</b>      | <b>Sequences 5'-3'</b>    | <b>used for</b> |
|-------------------------|---------------------|---------------------------|-----------------|
| <i>gyrB</i>             | F- <i>gyrB</i> -Ecq | ACCCGAATATCTTCTACTTCTCCAC | qPCR            |
|                         | R- <i>gyrB</i> -Ecq | CTGTAGCCTTCTTTGTCCATGTAG  |                 |
| <i>ectB</i>             | F- <i>ectB</i> -F1q | TCTGGGCTATATTCTCAAATCACAC | qPCR            |
|                         | R- <i>ectB</i> -F1q | CGCCTTGTACAGTCTCAAGAATAAC |                 |
| <i>odl1</i>             | F- <i>odl1</i> -F1q | ATCAGAACATCTGGCTTATGTGATT | qPCR            |
|                         | R- <i>odl1</i> -F1q | TTCTACAGAAATATCGAAGCTGACC |                 |
